# Supplementary material
Source: publisher figshare collection journal article supplement (https://gsajournals.figshare.com/ndownloader/files/27522434)
Supplement: Supplementary file 1 [file 27522434]

## Sheet: NLR_Summary
Following Schmutz et al. (2014)	lunatus	vulgaris
TNL (total)	22	106
TIR-NB-LRR	7	93
TIR-NB	15	13
CNL (total)	168	270
CN	42	4
N	18	7
NL	33	155
CNL	75	104
Other types	lunatus	vulgaris
RNL (total)	7	NA
RPW8+NB-ARC+LRR	5	NA
RPW8+NB-ARC	2	NA
Other (total)	15	NA
Coil+NB-ARC+TIR	2	NA
Coil+NB-ARC+LRR+TIR	5	NA
TIR	8	NA

## Sheet: NLR_list
Protein ID	Classification	Annotated domains	Protein length
tblastn_candidate_Rgene.90_3	NT	NB-ARC + TIR	593
tblastn_candidate_Rgene.79_3	NL	NB-ARC + LRR	732
scaffold974.g2883.t1	CNL	NB-ARC + LRR + Coil	1166
scaffold974.g2881.t1	CN	NB-ARC + Coil	1083
scaffold974.g2879.t1	CN	NB-ARC + Coil	1029
scaffold974.g2878.t1	CN	NB-ARC + Coil	1112
scaffold974.g2875.t1	CN	NB-ARC + Coil	1119
scaffold974.g2874.t1	CN	NB-ARC + Coil	1126
scaffold940.g2467.t1	CNL	NB-ARC + LRR + Coil	1540
scaffold9349.g21634.t1	other	NB-ARC + LRR + Coil + TIR	1018
scaffold9180.g20209.t1	CN	NB-ARC + Coil	3035
scaffold9180.g20208.t1	CNL	NB-ARC + LRR + Coil	2773
scaffold9180.g20206.t1	CN	NB-ARC + Coil	2013
scaffold9180.g20203.t1	CNL	NB-ARC + LRR + Coil	1505
scaffold9180.g20054.t1	CN	NB-ARC + Coil	2987
scaffold9180.g20052.t1	CNL	NB-ARC + LRR + Coil	2521
scaffold9180.g20046.t1	CN	NB-ARC + Coil	1361
scaffold9180.g19695.t1	other	NB-ARC + Coil + TIR	1524
scaffold9180.g19694.t1	other	NB-ARC + Coil + TIR	1486
scaffold9180.g19693.t1	other	NB-ARC + LRR + Coil + TIR	1409
scaffold8262.g17840.t1	CN	NB-ARC + Coil	1467
scaffold713.g1156.t1	RN	NB-ARC + RPW8	836
scaffold713.g1155.t1	NL	NB-ARC + LRR	662
scaffold713.g1154.t1	NL	NB-ARC + LRR	680
scaffold713.g1153.t1	CNL	NB-ARC + LRR + Coil	691
scaffold713.g1152.t1	RNL	NB-ARC + LRR + RPW8	816
scaffold713.g1151.t1	RNL	NB-ARC + LRR + RPW8	804
scaffold5849.g15643.t1	RNL	NB-ARC + LRR + RPW8	806
scaffold5841.g15261.t1	TNL	NB-ARC + LRR + TIR	1668
scaffold5582.g14826.t1	N	NB-ARC_only	633
scaffold5182.g13883.t1	N	NB-ARC_only	504
scaffold5182.g13680.t1	other	TIR_only	975
scaffold4009.g10961.t1	CN	NB-ARC + Coil	2033
scaffold4009.g10960.t1	N	NB-ARC_only	544
scaffold4009.g10959.t1	CN	NB-ARC + Coil	1678
scaffold4009.g10957.t1	CNL	NB-ARC + LRR + Coil	982
scaffold4009.g10956.t1	CN	NB-ARC + Coil	1624
scaffold4009.g10953.t1	CN	NB-ARC + Coil	1753
scaffold3595.g9500.t1	NT	NB-ARC + TIR	637
scaffold3121.g8298.t1	CN	NB-ARC + Coil	739
scaffold3121.g8137.t1	NL	NB-ARC + LRR	862
scaffold3098.g7906.t1	CN	NB-ARC + Coil	1439
scaffold27952.g63185.t1	NL	NB-ARC + LRR	826
scaffold26604.g60405.t1	CN	NB-ARC + Coil	1445
scaffold26009.g59788.t1	CNL	NB-ARC + LRR + Coil	1240
scaffold26009.g59759.t1	CNL	NB-ARC + LRR + Coil	1221
scaffold26009.g59736.t1	CNL	NB-ARC + LRR + Coil	1247
scaffold26009.g59725.t1	NL	NB-ARC + LRR	1270
scaffold26009.g59717.t1	CN	NB-ARC + Coil	1544
scaffold26009.g59699.t1	NL	NB-ARC + LRR	1121
scaffold25456.g58739.t1	N	NB-ARC_only	1050
scaffold25456.g58357.t1	NL	NB-ARC + LRR	1575
scaffold25456.g58034.t1	N	NB-ARC_only	933
scaffold21744.g52766.t1	NL	NB-ARC + LRR	905
scaffold21314.g52137.t1	CNL	NB-ARC + LRR + Coil	978
scaffold21314.g52030.t1	CNL	NB-ARC + LRR + Coil	891
scaffold21314.g52027.t1	CNL	NB-ARC + LRR + Coil	883
scaffold21314.g52024.t1	CNL	NB-ARC + LRR + Coil	886
scaffold21314.g52022.t1	NL	NB-ARC + LRR	683
scaffold21314.g52020.t1	CNL	NB-ARC + LRR + Coil	930
scaffold21314.g52019.t1	CNL	NB-ARC + LRR + Coil	1026
scaffold21314.g52018.t1	NL	NB-ARC + LRR	596
scaffold21314.g51997.t1	CNL	NB-ARC + LRR + Coil	895
scaffold21314.g51952.t1	NL	NB-ARC + LRR	840
scaffold21314.g51820.t1	CNL	NB-ARC + LRR + Coil	1207
scaffold20197.g50598.t1	CNL	NB-ARC + LRR + Coil	1223
scaffold20197.g50597.t1	N	NB-ARC_only	549
scaffold20197.g50596.t1	CNL	NB-ARC + LRR + Coil	1306
scaffold20197.g50593.t1	CNL	NB-ARC + LRR + Coil	1097
scaffold20197.g50592.t1	CNL	NB-ARC + LRR + Coil	1151
scaffold20197.g50591.t1	CNL	NB-ARC + LRR + Coil	1140
scaffold20197.g50590.t1	CN	NB-ARC + Coil	878
scaffold20197.g50588.t1	CNL	NB-ARC + LRR + Coil	1270
scaffold20197.g50585.t1	CNL	NB-ARC + LRR + Coil	1182
scaffold20197.g50583.t1	NL	NB-ARC + LRR	1088
scaffold20197.g50582.t1	CNL	NB-ARC + LRR + Coil	1098
scaffold20197.g50581.t1	CNL	NB-ARC + LRR + Coil	1211
scaffold20197.g50579.t1	CN	NB-ARC + Coil	778
scaffold20197.g50578.t1	CNL	NB-ARC + LRR + Coil	1211
scaffold20197.g50573.t1	CNL	NB-ARC + LRR + Coil	1027
scaffold20197.g50559.t1	CNL	NB-ARC + LRR + Coil	986
scaffold20197.g50529.t1	CNL	NB-ARC + LRR + Coil	1323
scaffold20197.g50526.t1	CNL	NB-ARC + LRR + Coil	1176
scaffold20197.g50525.t1	CNL	NB-ARC + LRR + Coil	1151
scaffold20197.g50523.t1	CNL	NB-ARC + LRR + Coil	955
scaffold20197.g50521.t1	CNL	NB-ARC + LRR + Coil	1360
scaffold20197.g50519.t1	CNL	NB-ARC + LRR + Coil	1412
scaffold20197.g50501.t1	CNL	NB-ARC + LRR + Coil	1168
scaffold20197.g50500.t1	other	NB-ARC + LRR + Coil + TIR	1088
scaffold20197.g50497.t1	CNL	NB-ARC + LRR + Coil	1259
scaffold20197.g50494.t1	CN	NB-ARC + Coil	977
scaffold20197.g50493.t1	CNL	NB-ARC + LRR + Coil	1201
scaffold20197.g50492.t1	CNL	NB-ARC + LRR + Coil	743
scaffold20197.g50490.t1	CNL	NB-ARC + LRR + Coil	1165
scaffold20197.g50489.t1	CNL	NB-ARC + LRR + Coil	1192
scaffold20197.g50487.t1	CNL	NB-ARC + LRR + Coil	1038
scaffold20197.g50486.t1	CNL	NB-ARC + LRR + Coil	1187
scaffold20197.g50484.t1	CNL	NB-ARC + LRR + Coil	1207
scaffold20197.g50482.t1	CNL	NB-ARC + LRR + Coil	1185
scaffold20197.g50481.t1	CNL	NB-ARC + LRR + Coil	1074
scaffold20197.g50480.t1	CNL	NB-ARC + LRR + Coil	1117
scaffold20197.g50469.t1	CNL	NB-ARC + LRR + Coil	895
scaffold20197.g50466.t1	CNL	NB-ARC + LRR + Coil	1176
scaffold20197.g50465.t1	CNL	NB-ARC + LRR + Coil	1164
scaffold20197.g50463.t1	CNL	NB-ARC + LRR + Coil	1122
scaffold20197.g50462.t1	CNL	NB-ARC + LRR + Coil	550
scaffold20197.g50461.t1	CN	NB-ARC + Coil	1295
scaffold20197.g50459.t1	NL	NB-ARC + LRR	1172
scaffold20197.g50455.t1	CNL	NB-ARC + LRR + Coil	1234
scaffold20197.g50125.t1	CNL	NB-ARC + LRR + Coil	1180
scaffold20197.g50030.t1	CNL	NB-ARC + LRR + Coil	980
scaffold20197.g49927.t1	CNL	NB-ARC + LRR + Coil	1263
scaffold20197.g49703.t1	TNL	NB-ARC + LRR + TIR	922
scaffold20197.g49698.t1	other	NB-ARC + LRR + Coil + TIR	729
scaffold20197.g49694.t1	TNL	NB-ARC + LRR + TIR	971
scaffold19128.g47535.t1	CN	NB-ARC + Coil	898
scaffold19128.g47397.t1	other	NB-ARC + LRR + Coil + TIR	1773
scaffold19128.g46796.t1	CN	NB-ARC + Coil	912
scaffold19128.g46795.t1	CN	NB-ARC + Coil	995
scaffold19128.g46793.t1	CN	NB-ARC + Coil	1292
scaffold19128.g46790.t1	CN	NB-ARC + Coil	1065
scaffold19128.g46779.t1	CN	NB-ARC + Coil	921
scaffold1862.g6134.t1	CN	NB-ARC + Coil	918
scaffold1862.g6133.t1	CN	NB-ARC + Coil	967
scaffold1862.g6132.t1	CN	NB-ARC + Coil	653
scaffold1862.g6131.t1	CN	NB-ARC + Coil	917
scaffold1862.g6130.t1	CN	NB-ARC + Coil	1434
scaffold1862.g6129.t1	CN	NB-ARC + Coil	959
scaffold1862.g6128.t1	CN	NB-ARC + Coil	912
scaffold1862.g6127.t1	CN	NB-ARC + Coil	955
scaffold18236.g43770.t1	TNL	NB-ARC + LRR + TIR	1181
scaffold18236.g43709.t1	N	NB-ARC_only	614
scaffold18236.g43703.t1	N	NB-ARC_only	673
scaffold18236.g43700.t1	CN	NB-ARC + Coil	545
scaffold18236.g43697.t1	N	NB-ARC_only	694
scaffold18236.g43267.t1	RN	NB-ARC + RPW8	834
scaffold18236.g43130.t1	NL	NB-ARC + LRR	973
scaffold18236.g42859.t1	N	NB-ARC_only	730
scaffold18236.g42856.t1	N	NB-ARC_only	893
scaffold18236.g42854.t1	N	NB-ARC_only	1099
scaffold18236.g42852.t1	NL	NB-ARC + LRR	1044
scaffold18236.g42851.t1	NL	NB-ARC + LRR	864
scaffold18236.g42818.t1	NL	NB-ARC + LRR	941
scaffold18236.g42816.t1	CNL	NB-ARC + LRR + Coil	945
scaffold18236.g42793.t1	CNL	NB-ARC + LRR + Coil	1105
scaffold1806.g5205.t1	CNL	NB-ARC + LRR + Coil	1237
scaffold1637.g4872.t1	CN	NB-ARC + Coil	899
scaffold15450.g38944.t1	NT	NB-ARC + TIR	860
scaffold15450.g38905.t1	CN	NB-ARC + Coil	793
scaffold15450.g38902.t1	CN	NB-ARC + Coil	749
scaffold15450.g38900.t1	other	TIR_only	615
scaffold15450.g38888.t1	NT	NB-ARC + TIR	877
scaffold15450.g38882.t1	NT	NB-ARC + TIR	983
scaffold15450.g38871.t1	other	TIR_only	694
scaffold15450.g38854.t1	N	NB-ARC_only	1085
scaffold15450.g38837.t1	other	TIR_only	643
scaffold15450.g38832.t1	other	TIR_only	501
scaffold15450.g38819.t1	N	NB-ARC_only	808
scaffold15450.g38818.t1	NT	NB-ARC + TIR	1062
scaffold15450.g38817.t1	NT	NB-ARC + TIR	801
scaffold15450.g38816.t1	NT	NB-ARC + TIR	890
scaffold15450.g38810.t1	NT	NB-ARC + TIR	546
scaffold15450.g38809.t1	NT	NB-ARC + TIR	654
scaffold15450.g38807.t1	other	TIR_only	703
scaffold15450.g38801.t1	N	NB-ARC_only	646
scaffold15450.g38800.t1	N	NB-ARC_only	754
scaffold15450.g38798.t1	NT	NB-ARC + TIR	726
scaffold15450.g38795.t1	NT	NB-ARC + TIR	618
scaffold15450.g38793.t1	NT	NB-ARC + TIR	957
scaffold15450.g38792.t1	NT	NB-ARC + TIR	717
scaffold15450.g38790.t1	NT	NB-ARC + TIR	646
scaffold15450.g38710.t1	CN	NB-ARC + Coil	1160
scaffold15009.g38316.t1	NL	NB-ARC + LRR	993
scaffold1431.g4429.t1	N	NB-ARC_only	724
scaffold1431.g4255.t1	TNL	NB-ARC + LRR + TIR	1371
scaffold1431.g4253.t1	TNL	NB-ARC + LRR + TIR	1371
scaffold13576.g33686.t1	NL	NB-ARC + LRR	590
scaffold13072.g30358.t1	NL	NB-ARC + LRR	866
scaffold13072.g30354.t1	NL	NB-ARC + LRR	861
scaffold13072.g30351.t1	NL	NB-ARC + LRR	866
scaffold13072.g30350.t1	CNL	NB-ARC + LRR + Coil	840
scaffold13072.g30349.t1	CNL	NB-ARC + LRR + Coil	856
scaffold13072.g30348.t1	NL	NB-ARC + LRR	822
scaffold13072.g30347.t1	NL	NB-ARC + LRR	862
scaffold13072.g30346.t1	NL	NB-ARC + LRR	867
scaffold13072.g30341.t1	NL	NB-ARC + LRR	790
scaffold13072.g30333.t1	NL	NB-ARC + LRR	840
scaffold13072.g30332.t1	NL	NB-ARC + LRR	877
scaffold13072.g30331.t1	NL	NB-ARC + LRR	878
scaffold13072.g30330.t1	NL	NB-ARC + LRR	877
scaffold13072.g29436.t1	RNL	NB-ARC + LRR + RPW8	818
scaffold13072.g29435.t1	RNL	NB-ARC + LRR + RPW8	824
scaffold12307.g27724.t1	other	TIR_only	539
scaffold12307.g27722.t1	other	TIR_only	555
scaffold12307.g27690.t1	TNL	NB-ARC + LRR + TIR	1190
scaffold12141.g27180.t1	NL	NB-ARC + LRR	971
scaffold12141.g27175.t1	CNL	NB-ARC + LRR + Coil	1246
scaffold12141.g27104.t1	N	NB-ARC_only	1246
scaffold12141.g27072.t1	CNL	NB-ARC + LRR + Coil	929
scaffold10695.g25623.t1	CNL	NB-ARC + LRR + Coil	882
scaffold10695.g25557.t1	CNL	NB-ARC + LRR + Coil	1056
scaffold10695.g25555.t1	CN	NB-ARC + Coil	669
scaffold10695.g25466.t1	NL	NB-ARC + LRR	928
scaffold10695.g25143.t1	CNL	NB-ARC + LRR + Coil	896
scaffold10695.g25061.t1	CNL	NB-ARC + LRR + Coil	1674
scaffold10695.g25059.t1	CNL	NB-ARC + LRR + Coil	1757
scaffold10695.g25052.t1	CNL	NB-ARC + LRR + Coil	2653
scaffold10695.g25050.t1	CNL	NB-ARC + LRR + Coil	2461
scaffold10695.g25047.t1	CNL	NB-ARC + LRR + Coil	2485
scaffold10695.g25043.t1	CNL	NB-ARC + LRR + Coil	2906
scaffold10695.g25042.t1	CNL	NB-ARC + LRR + Coil	2362
scaffold10695.g24902.t1	CNL	NB-ARC + LRR + Coil	1040

## Sheet: PlPp4_locus_scaffolds_Summary
Pl_scaffold	seq_len	A_count	a_count	C_count	c_count	G_count	g_count	T_count	t_count	N_count	n_count	run_count
scaffold3610	418809	113569	10550	75945	9842	72390	9208	114745	10275	2285	0	Counter({'T': 76037, 'A': 73907, 'G': 57256, 'C': 56551, 't': 7548, 'g': 7089, 'a': 7065, 'c': 6431, 'N': 18})
scaffold9215	19402	1769	2881	1630	2676	1646	2714	2298	3778	10	0	Counter({'t': 1945, 'g': 1906, 'a': 1825, 'c': 1762, 'T': 1193, 'G': 1168, 'A': 1122, 'C': 1076, 'N': 1})
scaffold5875	6844	1575	3	396	1	600	1	1769	3	2496	0	Counter({'T': 1067, 'A': 1005, 'G': 494, 'C': 351, 'a': 3, 'N': 3, 't': 3, 'g': 1, 'c': 1})
scaffold1606	452	199	0	35	0	36	0	181	1	0	0	Counter({'A': 117, 'T': 115, 'G': 32, 'C': 28, 't': 1})
scaffold974	933693	292725	7239	146867	5502	146149	3829	297170	6705	27507	0	Counter({'T': 183929, 'A': 182811, 'C': 118851, 'G': 118502, 'a': 4796, 't': 4706, 'c': 4188, 'g': 3002, 'N': 84})
scaffold17100	1349	565	0	144	0	116	0	524	0	0	0	Counter({'A': 311, 'T': 309, 'C': 125, 'G': 98})
scaffold15252	462	166	0	46	0	48	0	202	0	0	0	Counter({'T': 117, 'A': 109, 'C': 41, 'G': 40})
scaffold28048	615	250	0	80	0	51	0	234	0	0	0	Counter({'A': 139, 'T': 120, 'C': 69, 'G': 45})
scaffold28676	326	120	0	37	0	31	0	137	1	0	0	Counter({'T': 76, 'A': 68, 'C': 34, 'G': 29, 't': 1})
scaffold17079	367	140	0	33	0	28	1	165	0	0	0	Counter({'T': 102, 'A': 95, 'C': 30, 'G': 26, 'g': 1})
scaffold2035	677	252	0	79	0	69	1	275	1	0	0	Counter({'T': 171, 'A': 149, 'C': 70, 'G': 56, 'g': 1, 't': 1})
scaffold12398	4238	975	0	1135	1	1096	0	1030	1	0	0	Counter({'C': 880, 'G': 841, 'A': 731, 'T': 725, 'c': 1, 't': 1})
scaffold12684	11989	2725	0	3248	1	3086	0	2928	1	0	0	Counter({'C': 2435, 'G': 2347, 'T': 2071, 'A': 1985, 'c': 1, 't': 1})
scaffold329	54501	13057	1	14339	0	13506	0	13597	1	0	0	Counter({'C': 10759, 'G': 10575, 'T': 9643, 'A': 9494, 'a': 1, 't': 1})
scaffold25456	15359573	4521889	335026	2391857	273288	2390123	259093	4521654	331552	335091	0	Counter({'A': 2855907, 'T': 2854891, 'C': 1906726, 'G': 1906394, 'a': 232500, 't': 231683, 'c': 210615, 'g': 200355, 'N': 1091})
